# Supplementary material for: The crystal structure of Ac-AChBP in complex with α-conotoxin LvIA reveals the mechanism of its selectivity towards different nAChR subtypes
Source: PubMed Central journal article supplement (PMC5563285; doi:10.1007/s13238-017-0426-2), 2017-06-05

**The crystal structure of Ac-AChBP in complex with  $\alpha$ -conotoxin LvIA reveals the mechanism of its selectivity towards different nAChR subtypes**

Manyu Xu<sup>1#</sup>, Xiaopeng Zhu<sup>2#</sup>, Jinfang Yu<sup>1</sup>, Dongting Zhang<sup>2</sup>, Yong Wu<sup>2</sup>, Sulan Luo<sup>2\*</sup>, Xinquan Wang<sup>1\*</sup>

1. The Ministry of Education Key Laboratory of Protein Science, Beijing Advanced Innovation Center for Structural Biology, Collaborative Innovation Center for Biotherapy, School of Life Sciences, Tsinghua University, Beijing, 100084, P.R. China.
2. Key Laboratory of Tropical Biological Resources, Ministry of Education, Hainan University, Haikou, Hainan, 570228, P.R. China.

#Equal contribution

\*Correspondence to Sulan Luo ([luosulan2003@163.com](mailto:luosulan2003@163.com)) and Xinquan Wang

([xinquanwang@mail.tsinghua.edu.cn](mailto:xinquanwang@mail.tsinghua.edu.cn))

Running Title: Co-crystal structure of  $\alpha$ -conotoxin LvIA and acetylcholine binding proteins

**Figure S1: Supplementary Figure 1: Backbone orientations observed in co-crystal structures of Ac-AChBP with five  $\alpha$ -conotoxins.** (A) The backbone of LvIA is shown in light blue, BuIA in red, TxIA (A10L) in green, PnIA (A10L, D14K) in blue, ImI in yellow and GIC in magenta. (B) Multiple sequence alignment of  $\alpha$ -conotoxins LvIA, BuIA, TxIA (A10L), PnIA (A10L, D14K), ImI and GIC. Disulfide bridges between Cys2-Cys8 and Cys3-Cys16 are shown in red.

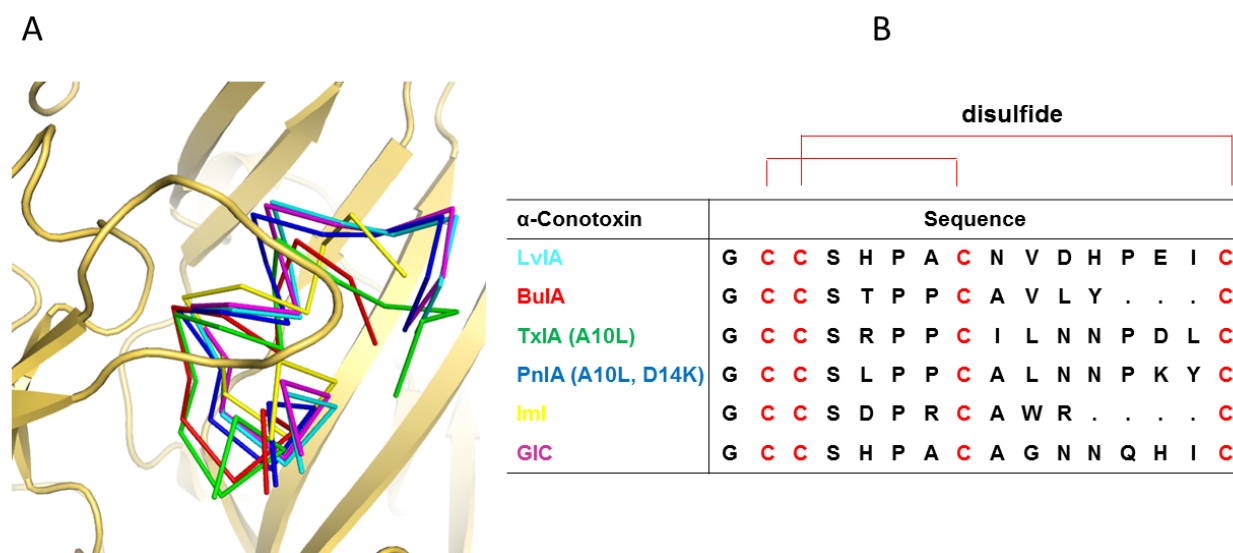

**Figure S2: Crystal structures of Ac-AChBP in different conformation.** (A) Top view of Ac-AChBP/HEPES structure, showing Loop C in close status. (B) Top view of Ac-AChBP/LvIA structure, showing Loop C in open status. (C) Top view of Ac-AChBP/GIC structure, showing Loop C in close status.

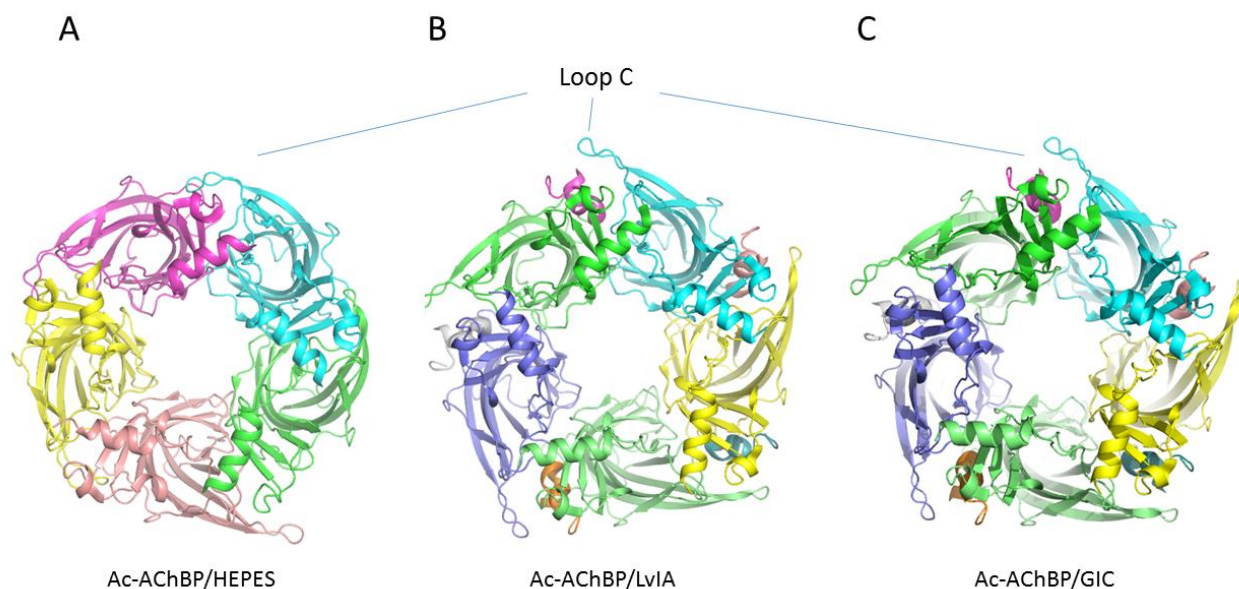

Supplement: 13238_2017_426_MOESM1_ESM.pdf [file 13238_2017_426_MOESM1_ESM.pdf]
